# Supplementary material
Source: Springer Nature journal article supplement (https://www.springermedizin.de/resource/supplementary/12889_2007_1339_MOESM2_ESM.pdf/9502988)

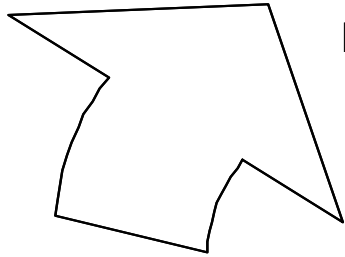

**Source of help**

Friends  
Parents  
Professionals

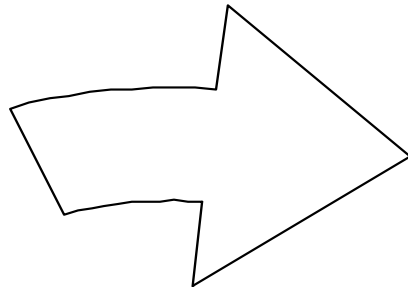

**Composition of population**

Gender Age  
Ethnicity

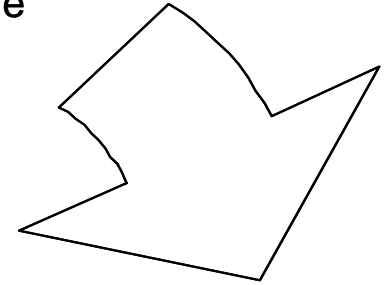

**Perception of Self-Harm**

Spur of the moment  
My choice  
Life/problems have change  
Not serious/important

**Decision to seek help**

Don't know if I want to  
I found it hard to ask

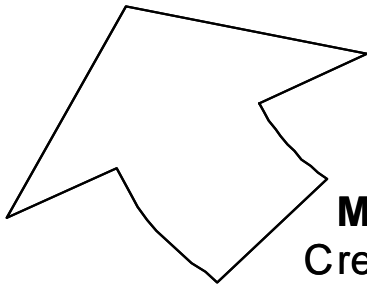

**Motivation to act**

Creates more trouble  
Hurt those I care  
Label me an  
"attention seeker"  
Emotional states

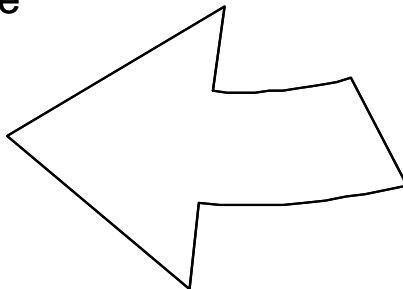

**Perception something can be done**

I can/should be able  
to cope on my own  
I don't want help  
No one understands

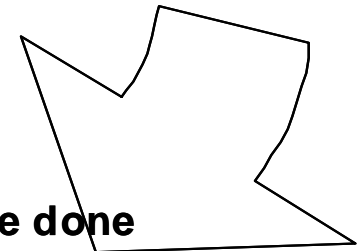

Supplement: MOESM2 [file 9502988]
